# Supplementary material for: Genetic sharing and heritability of paediatric age of onset autoimmune diseases
Source: PubMed Central journal article supplement (PMC4633631; doi:10.1038/ncomms9442), 2015-10-09
Supplement: ncomms9442-s1.pdf [file ncomms9442-s1.pdf]

**Supplementary Figure 1. SNP-heritability calculations reported by prior studies for A. Relevant AI diseases and B. All available diseases curated.**

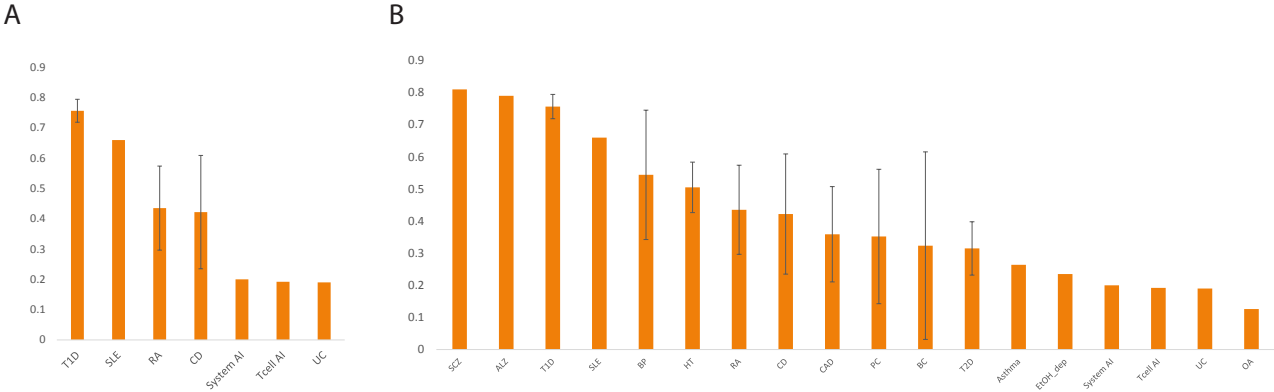

Raw data used from prior GWAS SNP-heritability estimates are provided in **Supplementary Table 1C**.

Supplementary Figure 2 Partitioning phenotypic variance to genetic and non-genetic components for all ten traits examined.

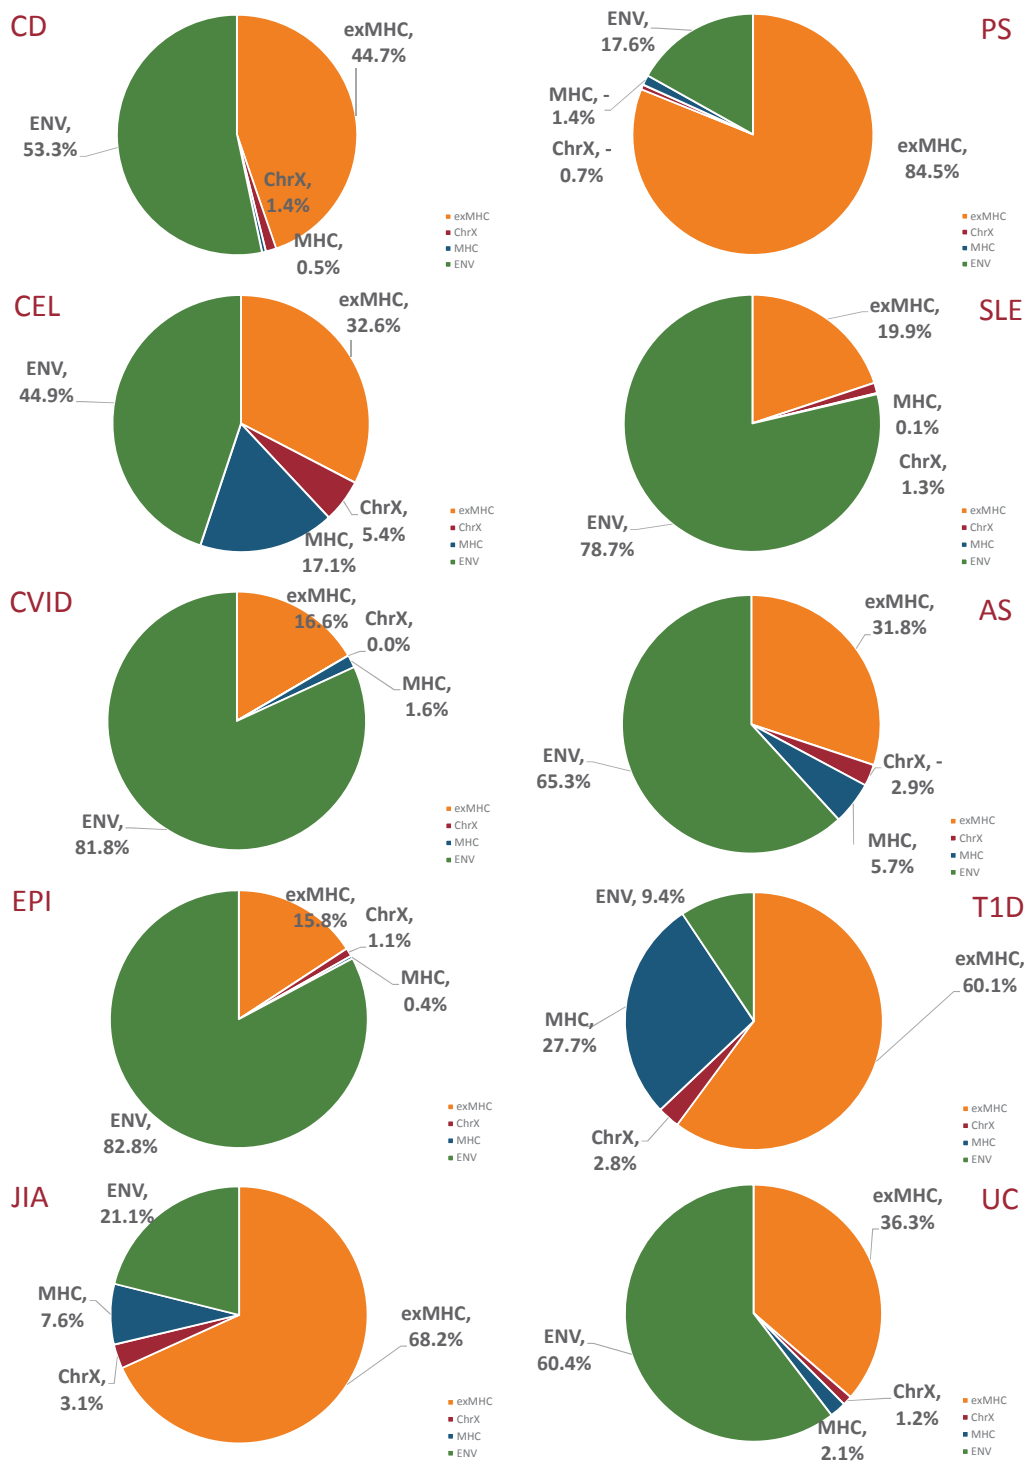

Pie chart includes Non-genetic (*ENV*, Green) and Genetic components, which is sub-divided into contributions from the autosomal regions excluding the extended *MHC* (*exMHC*, Orange), the extended *MHC* (*MHC*, Blue), and the *X-chromosome* (*ChrX*, Red).

Supplementary Figure 3 Effect of LD-pruning on SNP-heritability estimates.

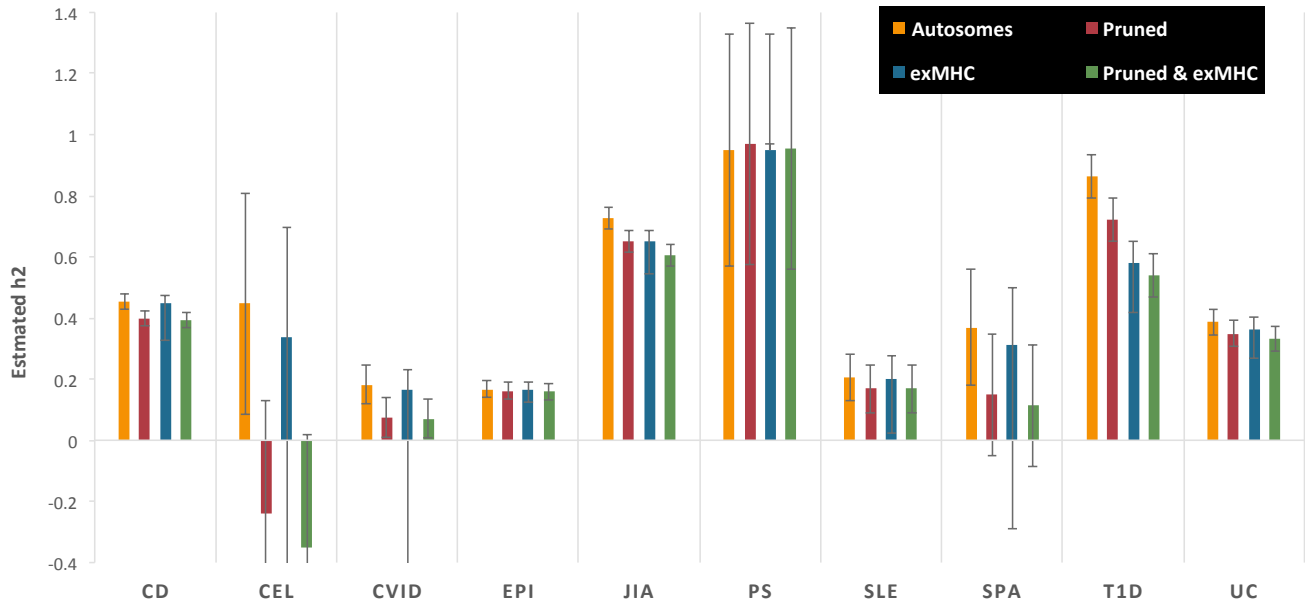

Autosomal  $SNP-h^2$  estimations using all genotyped markers including the extended *MHC* (Orange) is significantly greater than when the markers are LD-pruned (Red). When the *MHC* is removed, the difference in  $SNP-h^2$  calculated between using the full autosomal genotyped SNPs (Blue) as compared those that are LD-pruned (Green) is minimal.

**Supplementary Figure 4 Genetically-inferred ancestry estimates of included cohorts based on principal components analysis (PCA)**

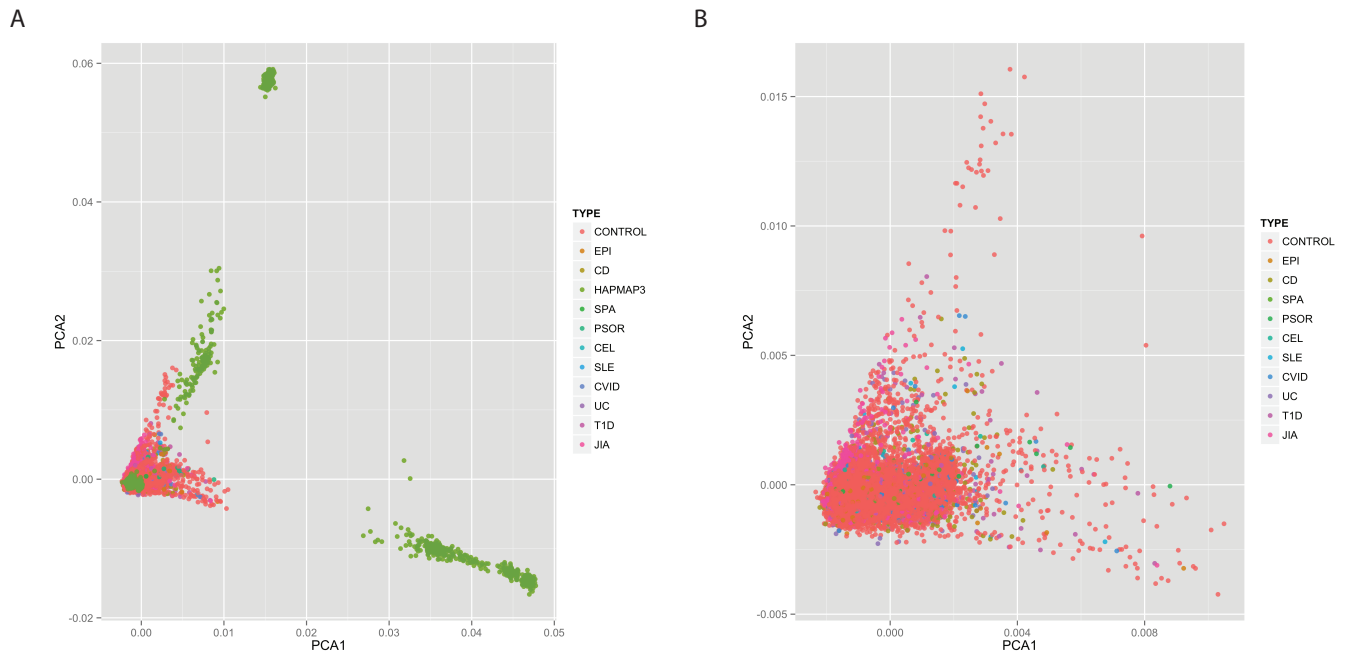

Top two principal components from PCA of genome wide SNP genotypes in the genotyped study cohort with (A) and without (B) the HapMap 3 reference panel dataset subjects. Plots are color-coded by the pAID cohorts either with or without the HapMap subjects. Populations and cohorts sizes are as specified in **Table 1A**.

**Supplementary Table 1 Reported pAID prevalence in the Western Hemisphere in Caucasoid populations**

| pAID | Data 1            | REF           | Data 2              | REF           | Data 3         | REF           | Data 4        | REF           |
|------|-------------------|---------------|---------------------|---------------|----------------|---------------|---------------|---------------|
| SPA  | 687/217,000       | <sup>1</sup>  | 62/10000            | <sup>2</sup>  | 52/10000       | <sup>3</sup>  |               |               |
| PS   | 10788/5,472,032   | <sup>4</sup>  | 114,521/7,533,475   | <sup>5</sup>  | 548/21,921     | <sup>6</sup>  | 33981/1359240 | <sup>7</sup>  |
| CEL  | 2722/5,472,032    | <sup>4</sup>  | 6/813               | <sup>8</sup>  | 4/2230         | <sup>9</sup>  | 10/1002       | <sup>10</sup> |
| SLE  | 1732/5,472,032    | <sup>4</sup>  | 62/2,210,389        | <sup>11</sup> | 51/100,000     | <sup>12</sup> |               |               |
| CVID | 87500/297,386,000 | <sup>13</sup> | 52.5/1,000,000      | <sup>14</sup> | 1/30,000       | <sup>15</sup> |               |               |
| UC   | 20669/5,472,032   | <sup>4</sup>  | 15,873/8,997,731    | <sup>16</sup> | 8/100,000      | <sup>17</sup> |               |               |
| T1D  | 51783/5,472,032   | <sup>4</sup>  | 980/11,194,478      | <sup>18</sup> | 4808/1,885,451 | <sup>19</sup> |               |               |
| JIA  | 87/445856         | <sup>20</sup> | 294,000/295,753,000 | <sup>21</sup> | 78/364,939     | <sup>22</sup> |               |               |
| CD   | 12309/5,472,032   | <sup>4</sup>  | 13,918/8,997,731    | <sup>16</sup> | 140/496,280    | <sup>23</sup> |               |               |

**Supplementary Table 2 Reported pAID heritability estimates in the Western Hemisphere in Caucasoid populations**

| pAID | Data 1 | Ref 1*        | Data 2 | Ref 2*        | Data 3 | Ref 3*        |
|------|--------|---------------|--------|---------------|--------|---------------|
| CD   | 58%    | <sup>24</sup> | 80%    | <sup>25</sup> |        |               |
| CEL  | 59%    | <sup>26</sup> | 87%    | <sup>27</sup> | 0.57   | <sup>28</sup> |
| JIA  | 65%    | <sup>29</sup> | 53%    | <sup>30</sup> | 0.6    | <sup>30</sup> |
| PS   | 68%    | <sup>31</sup> | 91%    | <sup>32</sup> |        |               |
| SLE  | 66%    | <sup>33</sup> | 66%    | <sup>34</sup> |        |               |
| SPA  | 90%    | <sup>35</sup> | 90%    | <sup>36</sup> |        |               |
| T1D  | 88%    | <sup>37</sup> | 88%    | <sup>38</sup> |        |               |
| UC   | 42%    | <sup>24</sup> | 53%    | <sup>25</sup> |        |               |

**Supplementary Table 3 Published SNP- $h^2$  estimates from literature.**

| Trait              | So <sup>39</sup> | Zaitlen <sup>40</sup> | Yang <sup>41</sup> | Chen <sup>42</sup> | Lee <sup>43</sup> | Speed <sup>44</sup> | Speed <sup>45</sup> |
|--------------------|------------------|-----------------------|--------------------|--------------------|-------------------|---------------------|---------------------|
| Method             | Variants         | REML                  | REML               | GREML              | GREML             | GREML               | LDAC                |
| Scale              | Liability        | Liability             | Liability          | Liability          | Liability         | Observed            | Observed            |
| ALZ                | 0.79             | --                    | --                 | --                 | --                | --                  | --                  |
| BP                 | 0.77             | --                    | 0.32               | --                 | 0.35              | 0.69                | 0.59                |
| BC                 | 0.53             | 0.117                 | --                 | --                 | --                | --                  | --                  |
| CAD                | 0.49             | 0.146                 | --                 | --                 | --                | 0.39                | 0.41                |
| CD                 | 0.55             | --                    | 0.18               | 0.26               | --                | 0.54                | 0.58                |
| PC                 | 0.5              | 0.204                 | --                 | --                 | --                | --                  | --                  |
| SCZ                | 0.81             | --                    | --                 | --                 | --                | --                  | --                  |
| SLE                | 0.66             | --                    | --                 | --                 | --                | --                  | --                  |
| T1D                | 0.8              | --                    | 0.25 (exMHC)       | --                 | --                | 0.73                | 0.74                |
| T2D                | 0.42             | 0.254                 | --                 | --                 | 0.21              | 0.35                | 0.34                |
| AI (T-cell)*       | --               | 0.192                 | --                 | --                 | --                | --                  | --                  |
| AI (Systemic)*     | --               | 0.2                   | --                 | --                 | --                | --                  | --                  |
| Asthma             | --               | 0.264                 | --                 | --                 | --                | --                  | --                  |
| RA                 | --               | 0.261                 | --                 | --                 | 0.39              | 0.57                | 0.52                |
| OA                 | --               | 0.126                 | --                 | --                 | --                | --                  | --                  |
| Alcohol Dependence | --               | 0.235                 | --                 | --                 | --                | --                  | --                  |
| UC                 | --               | --                    | --                 | 0.19               | --                | --                  | --                  |
| HT                 | --               | --                    | --                 | --                 | 0.575             | 0.42                | 0.52                |

See text for details and discussion. Disease or trait is listed on left and each column heading corresponding to first author last name of a reference as cited by superscript. \*Per Zaitlen et al, AI disease that the authors classified as being 'T-cell mediated' or 'Systemic' (ie. RA/SLE/SSc/AS). References for each citation are as annotated in superscripts following each first author's last name.

**Supplementary Table 4 Percentages of total phenotypic variance explained by genetic variance (the autosome excluding the MHC, the MHC and the X-chromosome) and non-genetic variance (ENV).**

| pAID | Auto exMHC | ChrX  | MHC   | ENV   |
|------|------------|-------|-------|-------|
| CD   | 44.7%      | 1.4%  | 0.5%  | 53.3% |
| CEL  | 32.6%      | 5.4%  | 17.1% | 44.9% |
| CVID | 16.6%      | 0.0%  | 1.6%  | 81.8% |
| EPI  | 15.8%      | 1.1%  | 0.4%  | 82.8% |
| JIA  | 68.2%      | 3.1%  | 7.6%  | 21.1% |
| PS   | 84.5%      | -0.7% | -1.4% | 17.6% |
| SLE  | 19.9%      | 1.3%  | 0.1%  | 78.7% |
| AS   | 31.8%      | -2.9% | 5.7%  | 65.3% |
| T1D  | 60.1%      | 2.8%  | 27.7% | 9.4%  |
| UC   | 36.3%      | 1.2%  | 2.1%  | 60.4% |

**Supplementary Table 5 Lead GWAS association signals across the extended *MHC* for each pAID**

| pAID | Marker                 | POS (hg19) | MAF  | A2 | P        | BETA  | SE   |
|------|------------------------|------------|------|----|----------|-------|------|
| CD   | rs1626392              | 29840223   | 0.21 | G  | 2.3E-07  | -0.22 | 0.04 |
| CEL  | SNP_DQB1_32740731      | 32740731   | 0.22 | C  | 1.0E-26  | -1.60 | 0.15 |
| CVID | SNP_B_31432003_C       | 31432003   | 0.19 | A  | 3.8E-08  | 0.61  | 0.11 |
| JIA  | AA_DRB1_181_32657335_x | 32657335   | 0.03 | A  | 1.6E-99  | -2.57 | 0.12 |
| PSOR | HLA_B_1302             | 31431272   | 0.03 | A  | 3.1E-04  | -1.74 | 0.48 |
| SLE  | rs537160               | 32024379   | 0.30 | C  | 4.5E-08  | -0.55 | 0.10 |
| SPA  | HLA_B_2705             | 31431272   | 0.03 | A  | 1.9E-11  | -2.88 | 0.43 |
| T1D  | AA_DQB1_57_32740666_A  | 32740666   | 0.34 | A  | 3.0E-170 | -1.72 | 0.06 |
| UC   | SNP_DRB1_32660090      | 32660090   | 0.31 | A  | 2.5E-15  | 0.43  | 0.05 |

\* P (Presence) or A (Absence) of the indicated HLA 4-digit allele, AA (amino acid [ie. lysine (K) or alanine (A)]), deletion (x). Details of the notation for the markers are as described by *Jia et al.*<sup>46</sup> A2: Alternative allele or marker. For deletions, A denotes 'Absence of'. P: P-value. MAF: Minor Allele Frequency. POS: position in the hg19 human genome reference. BETA: effect size on logistic regression. SE: standard error.

**Supplementary Table 6 Population-based estimates of heritability (POP- $h^2$ ) attributable to the *MHC* from literature**

| pAID | Total $h^2$ (1) | Total $h^2$ (2) | Mean $h^2$ | % MHC | REF              |
|------|-----------------|-----------------|------------|-------|------------------|
| SPA  | 0.90            | 0.90            | 0.90       | 0.25  | <sup>3</sup>     |
| PS   | 0.68            | 0.91            | 0.80       | 0.50  | <sup>47</sup>    |
| CEL  | 0.59            | 0.87            | 0.73       | 0.40  | <sup>48,49</sup> |
| SLE  | 0.66            | 0.66            | 0.66       | 0.10  | <sup>50</sup>    |
| UC   | 0.42            | 0.53            | 0.48       | 0.60  | <sup>51</sup>    |
| T1D  | 0.40            | 0.62            | 0.88       | 0.50  | <sup>51</sup>    |
| JIA  | 0.65            | 0.53            | 0.59       | 0.33  | <sup>51</sup>    |
| CD   | 0.58            | 0.80            | 0.69       | 0.10  | <sup>51</sup>    |

See Supplementary Table 1B for details of the total heritability references. REF refers to references of the percentage heritability attributable to the *MHC*.

**Supplementary Table 7 Estimates of SNP- $h^2$  attributable to the *MHC* using other GWAS datasets**

| Disease | SNP- $h^2$ | SNP- $h^2$ MHC | % MHC  |
|---------|------------|----------------|--------|
| BPD     | 0.98       | 0              | 0.00%  |
| CAD     | 0.41       | 0              | 0.00%  |
| CD      | 1          | 0.02           | 2.00%  |
| HT      | 0.48       | 0              | 0.00%  |
| RA      | 0.57       | 0.13           | 22.81% |
| T1D     | 0.65       | 0.44           | 67.69% |
| T2D     | 0.52       | 0              | 0.00%  |

Supplementary Table 8 Known HLA haplotypes associated with AI Diseases

| Disease                                                      | HLA Associated                                                                                                                                       | REF   |
|--------------------------------------------------------------|------------------------------------------------------------------------------------------------------------------------------------------------------|-------|
| <b>Ankylosing spondylitis</b>                                | Class I:<br>- B27<br>Class II:                                                                                                                       | 52    |
| <b>Asthma</b>                                                | Class I:<br>Class II:<br>- DRB1*03 haplotype<br>Class III:<br>- TNFA-308                                                                             | 53    |
| <b>Autoimmune thyroid diseases (Grave's &amp; Hashimoto)</b> | Class I:<br>Class II:<br>- DR3 (DRB1*03; DRB1*Arg74),<br>- DR4 (in Hashimoto's thyroiditis)                                                          | 52,54 |
| <b>Celiac disease</b>                                        | Class I:<br>Class II:<br>- DQ2 (DRB1*0301-DQA1*0501-DQB1*0201)<br>- DQ8 (DRB1*04-DQA1*0301-DQB1*0302)                                                | 55,56 |
| <b>Crohn's disease</b>                                       | Class I:<br>Class II:<br>- DRB1*0103-DQB1*0501<br>- DRB1*04                                                                                          | 51,57 |
| <b>Multiple sclerosis</b>                                    | Class I:<br>- A*02:01<br>Class II:<br>- DR2 (DRB1*1501, DQA1*0102, DQB1*0602)<br>- DRB1*0501<br>- DRB1*03:01, *13:03<br>- DQB1*02:01<br>- DPB1*03:01 | 58,59 |
| <b>Psoriasis</b>                                             | Class I:<br>- HLA-B*57<br>- HLA-B*40 (Decreased susceptibility)<br>- Cw*0602<br>- Cw*1203<br>Class II:<br>Class III:<br>- HCP5                       | 60    |



|                                            |                                                                                                                                                                                                                                                                                                                                          |          |
|--------------------------------------------|------------------------------------------------------------------------------------------------------------------------------------------------------------------------------------------------------------------------------------------------------------------------------------------------------------------------------------------|----------|
| <b><i>Rheumatoid arthritis</i></b>         | <p>Class I:</p> <ul style="list-style-type: none"> <li>- HLB*08</li> </ul> <p>Class II:</p> <ul style="list-style-type: none"> <li>- DRBI *0401, *0404, *0101, *0405, *0101, *1001, *0901</li> </ul> <p>Class III:</p> <ul style="list-style-type: none"> <li>- TNF</li> </ul>                                                           | 61,62    |
| <b><i>Systemic lupus erythematosus</i></b> | <p>Class I:</p> <p>Class II:</p> <ul style="list-style-type: none"> <li>- DR3 (DRB1*0301-DQB1*0201),</li> <li>- DR2 (DRB1*1501-DQB1*0602),</li> <li>- DR8 (DRB1*0801-DQB1*0402)</li> <li>- DRBI*0301</li> </ul> <p>Class III:</p> <ul style="list-style-type: none"> <li>- SCIV2L/ CFB/ RDBP/ DOM3Z/STK19</li> <li>- C4A, C4B</li> </ul> | 63       |
| <b><i>Type 1 diabetes</i></b>              | <p>Class I:</p> <ul style="list-style-type: none"> <li>- HLA-A</li> <li>- HLA-B. Protective effect – DQB1*0602</li> </ul> <p>Class II:</p> <ul style="list-style-type: none"> <li>- DQ2 (DRB1*0301-DQA1*0501-DQB1*0201)</li> <li>- DQ8 (DRB1*04-DQA1*0301-DQB1*0302)</li> </ul>                                                          | 64       |
| <b><i>Ulcerative colitis</i></b>           | <p>Class I:</p> <p>Class II:</p> <ul style="list-style-type: none"> <li>- DRB1*0103-DQB1*0501</li> <li>- DRB1*1502-BTNL2)</li> <li>- DRB1* 0501</li> </ul>                                                                                                                                                                               | 51,65,66 |
| <b><i>Multiple Autoimmune diseases</i></b> | <p>Class I:</p> <ul style="list-style-type: none"> <li>- HLA-A1</li> <li>- HLA-B8</li> </ul> <p>Class II:</p> <ul style="list-style-type: none"> <li>- HLA-DR3</li> </ul>                                                                                                                                                                | 51       |
| <b><i>Sarcoidosis</i></b>                  | <p>Class I:</p> <p>Class II:</p> <ul style="list-style-type: none"> <li>- HLA-DRB1*03</li> </ul>                                                                                                                                                                                                                                         | 67       |

**Supplementary Table 9 Prevalence of AI Disease comorbidities among Western Caucasoid populations**

| Prevalence | Data      | REF | Data      | REF | Data 3     | REF | Data4     | REF |
|------------|-----------|-----|-----------|-----|------------|-----|-----------|-----|
| CEL-CD     | --        | --  | 4/356     | 8   | --         | --  | --        | --  |
| CEL-CVID   | --        | --  | --        | --  | --         | --  | --        | --  |
| CEL-JIA    | 0/408     | 4   | --        | --  | --         | --  | --        | --  |
| CEL-SLE    | --        | --  | 4/356     | 8   | --         | --  | --        | --  |
| CEL-T1D    | 12/408    | 4   | 8/356     | 8   | 96/9243    | 10  | 921/28958 | 5   |
| CEL-PS     | --        | --  | 46/356    | 8   | --         | --  | 401/28958 | 5   |
| CEL-SPA    | --        | --  | 2/356     | 8   | --         | --  | --        | --  |
| CEL-UC     | --        | --  | 3/356     | 8   | --         | --  | --        | --  |
| CVID-CD    | 1/52      | 68  | --        | --  | --         | --  | --        | --  |
| CVID-JIA   | 4/52      | 68  | --        | --  | --         | --  | --        | --  |
| CVID-SLE   | 1/116     | 69  | --        | --  | --         | --  | --        | --  |
| JIA-T1D    | 4/443     | 20  | 0/53      | 70  | --         | --  | --        | --  |
| JIA-CEL    | 10/151    | 71  | 1/53      | 70  | --         | --  | --        | --  |
| PS-CD      | 95/10788  | 72  | 116/ 1353 | 73  | 72/1402    | 73  | 64/12502  | 74  |
| PS-CEL     | --        | --  | --        | --  | --         | --  | 36/12502  | 75  |
| PS-SLE     | 19/10788  | 72  | --        | --  | --         | --  | --        | --  |
| PS-T1D     | 442/10788 | 72  | --        | --  | --         | --  | --        | --  |
| PS-SPA     | --        | --  | --        | --  | --         | --  | --        | --  |
| PS-UC      | 122/10788 | 72  | 166/1353  | 73  | 74/1402    | 73  | 60/ 12502 | 74  |
| SLE-CD     | 13/1732   | 72  | --        | --  | --         | --  | --        | --  |
| SLE-PS     | 19/1732   | 72  | --        | --  | --         | --  | --        | --  |
| SLE-CEL    | 3/1732    | 72  | --        | --  | --         | --  | --        | --  |
| SLE-T1D    | 46/1732   | 72  | --        | --  | --         | --  | --        | --  |
| SLE-UC     | 25/1732   | 72  | --        | --  | --         | --  | --        | --  |
| T1D-PS     | 442/51783 | 72  | --        | --  | --         | --  | --        | --  |
| T1D-SLE    | 46/51783  | 72  | --        | --  | --         | --  | --        | --  |
| T1D-CEL    | 108/51783 | 72  | 9/52      | 76  | 917/ 41566 | 77  | 33/ 1000  | 19  |
| T1D-CEL    | 22/ 492   | 78  | 9/ 281    | 79  | 7/509      | 18  | --        | --  |
| T1D-UC     | 435/51783 | 72  | --        | --  | --         | --  | --        | --  |
| T1D-CD     | 217/51783 | 72  | --        | --  | --         | --  | --        | --  |
| T1D-JIA    | 4/443     | 16  | --        | --  | --         | --  | --        | --  |
| UC-CD      | --        | --  | --        | --  | 2676/20699 | 72  | --        | --  |
| UC-T1D     | 84/12185  | 80  | 63/7525   | 81  | 435/20669  | 72  | --        | --  |
| UC-SPA     | 117/12185 | --  | 9/976     | 23  | 7/84       | 82  | 7/273     | 83  |
| UC-SLE     | 10/12185  | --  | 18/7525   | 81  | 25/20669   | 72  | --        | --  |
| UC-CEL     | --        | --  | --        | --  | 77/20669   | 72  | --        | --  |
| UC-PS      | 424/12185 | --  | 138/7525  | 81  | 122/20669  | 72  | --        | --  |
| CD-UC      | --        | --  | --        | --  | 2676/12309 | 72  | --        | --  |
| CD-CEL     | --        | --  | --        | --  | 101/12309  | 72  | --        | --  |
| CD-T1D     | 35/7988   | 80  | 43/4021   | 81  | 217/12309  | 72  | --        | --  |
| CD-SLE     | 12/7988   | 80  | 8/4021    | 81  | 13/12309   | 72  | --        | --  |
| CD-PS      | 317/7988  | 80  | 75/4021   | 81  | 95/12309   | 72  | --        | --  |
| CD-SPA     | 107/7988  | 80  | 6/483     | 23  | 9/78       | 82  | 8/133     | 83  |

**Supplementary Table 10 Full results from the bivariate co-heritability analysis showing genetic correlation estimates for all 45 pairwise AI disease combinations**

|           | Auto <i>r</i> G | Auto <i>SE</i> | Auto <i>P</i> | exMHC <i>r</i> G | exMHC <i>SE</i> | exMHC <i>P</i> | chrX <i>r</i> G | chrX <i>SE</i> | chrX <i>P</i> |
|-----------|-----------------|----------------|---------------|------------------|-----------------|----------------|-----------------|----------------|---------------|
| CEL-CD    | 0.192           | 0.162          | 1.00E-01      | 0.211            | 0.188           | 1.05E-01       | -0.17           | 0.31           | 0.29          |
| CEL-CVID  | 0.199           | 0.391          | 2.99E-01      | 0.245            | 0.475           | 2.94E-01       | NA              | NA             | NA            |
| CEL-JIA   | 0.013           | 0.182          | 4.71E-01      | 0.121            | 0.239           | 2.96E-01       | 0.44            | 0.19           | 0.01          |
| CEL-SLE   | 0.008           | 0.415          | 4.92E-01      | 0.054            | 0.498           | 4.56E-01       | 0.02            | 0.15           | 0.45          |
| CEL-T1D   | 0.072           | 0.200          | 3.57E-01      | -0.084           | 0.285           | 3.82E-01       | -0.03           | 0.31           | 0.46          |
| CEL-UC    | -0.018          | 0.259          | 4.73E-01      | -0.051           | 0.323           | 4.38E-01       | 0.11            | 0.31           | 0.37          |
| CVID-CD   | 0.101           | 0.109          | 1.75E-01      | 0.115            | 0.116           | 1.56E-01       | -1.00           | 124.42         | 0.50          |
| CVID-JIA  | 0.343           | 0.127          | 1.22E-03      | 0.354            | 0.142           | 2.47E-03       | -1.00           | 3.78           | 0.50          |
| CVID-T1D  | 0.177           | 0.130          | 7.89E-02      | 0.207            | 0.167           | 9.92E-02       | -1.00           | 291.00         | 0.50          |
| CVID-UC   | 0.138           | 0.158          | 1.89E-01      | 0.134            | 0.170           | 2.12E-01       | -1.00           | 34.60          | 0.50          |
| EPI-CD    | 0.023           | 0.075          | 3.79E-01      | 0.003            | 0.077           | 4.85E-01       | 0.89            | 0.39           | 0.00          |
| EPI-CEL   | -0.099          | 0.264          | 3.54E-01      | -0.078           | 0.304           | 3.99E-01       | -0.17           | 0.25           | 0.26          |
| EPI-CVID  | -0.122          | 0.183          | 2.52E-01      | -0.095           | 0.196           | 3.14E-01       | -1.00           | 219.03         | 0.50          |
| EPI-JIA   | -0.150          | 0.079          | 2.95E-02      | -0.142           | 0.085           | 4.87E-02       | -0.04           | 0.19           | 0.42          |
| EPI-PSOR  | 0.087           | 0.188          | 3.23E-01      | 0.030            | 0.189           | 4.38E-01       | -0.36           | 0.35           | 0.15          |
| EPI-SLE   | 0.153           | 0.176          | 1.92E-01      | 0.187            | 0.183           | 1.52E-01       | -0.21           | 0.15           | 0.10          |
| EPI-SPA   | 0.090           | 0.215          | 3.37E-01      | 0.073            | 0.240           | 3.80E-01       | 0.05            | 2.15           | 0.49          |
| EPI-T1D   | -0.017          | 0.086          | 4.20E-01      | 0.022            | 0.105           | 4.18E-01       | 0.09            | 0.31           | 0.39          |
| EPI-UC    | 0.197           | 0.103          | 2.77E-02      | 0.248            | 0.108           | 1.06E-02       | -0.63           | 0.29           | 0.01          |
| JIA-CD    | 0.019           | 0.049          | 3.50E-01      | 0.030            | 0.053           | 2.85E-01       | 0.02            | 0.21           | 0.47          |
| PSOR-CD   | -0.089          | 0.113          | 2.15E-01      | -0.100           | 0.115           | 1.92E-01       | 0.31            | 0.45           | 0.25          |
| PSOR-CEL  | -0.092          | 0.428          | 4.14E-01      | -0.058           | 0.495           | 4.53E-01       | 0.58            | 0.36           | 0.05          |
| PSOR-CVID | 0.271           | 0.269          | 1.50E-01      | 0.284            | 0.282           | 1.49E-01       | NA              | NA             | NA            |
| PSOR-JIA  | 0.006           | 0.123          | 4.81E-01      | 0.042            | 0.131           | 3.77E-01       | 0.03            | 0.22           | 0.44          |
| PSOR-SLE  | -0.115          | 0.260          | 3.29E-01      | -0.065           | 0.262           | 4.02E-01       | 0.32            | 0.20           | 0.07          |
| PSOR-T1D  | -0.241          | 0.139          | 3.29E-02      | -0.282           | 0.167           | 3.74E-02       | -0.27           | 0.39           | 0.25          |
| PSOR-UC   | -0.316          | 0.169          | 2.31E-02      | -0.289           | 0.171           | 3.76E-02       | -0.15           | 0.39           | 0.36          |
| SLE-CD    | -0.266          | 0.120          | 8.25E-03      | -0.255           | 0.121           | 1.15E-02       | 0.07            | 0.19           | 0.37          |
| SLE-CVID  | -0.149          | 0.261          | 2.82E-01      | -0.187           | 0.280           | 2.49E-01       | 1.00            | 6.04           | 0.50          |
| SLE-JIA   | 0.115           | 0.115          | 1.58E-01      | 0.091            | 0.123           | 2.28E-01       | -0.19           | 0.11           | 0.05          |
| SLE-T1D   | -0.011          | 0.126          | 4.65E-01      | -0.021           | 0.153           | 4.46E-01       | -0.10           | 0.22           | 0.34          |
| SLE-UC    | -0.010          | 0.151          | 4.74E-01      | -0.020           | 0.157           | 4.50E-01       | -0.29           | 0.19           | 0.07          |
| SPA-CD    | -0.215          | 0.138          | 4.64E-02      | -0.235           | 0.156           | 4.67E-02       | 1.00            | 5.50           | 0.36          |
| SPA-CEL   | 0.284           | 0.520          | 2.84E-01      | 0.383            | 0.700           | 2.76E-01       | 0.77            | 3.18           | 0.26          |
| SPA-CVID  | -0.079          | 0.320          | 4.02E-01      | -0.083           | 0.363           | 4.09E-01       | NA              | NA             | NA            |
| SPA-JIA   | 0.116           | 0.138          | 1.95E-01      | 0.091            | 0.158           | 2.80E-01       | -1.00           | 0.66           | 0.00          |
| SPA-PSOR  | 0.171           | 0.322          | 2.94E-01      | 0.214            | 0.357           | 2.69E-01       | 1.00            | 2.96           | 0.22          |
| SPA-SLE   | 0.101           | 0.302          | 3.68E-01      | 0.096            | 0.334           | 3.86E-01       | 0.80            | 2.41           | 0.13          |
| SPA-T1D   | 0.158           | 0.164          | 1.58E-01      | 0.229            | 0.223           | 1.37E-01       | -1.00           | 1.72           | 0.16          |
| SPA-UC    | -0.012          | 0.181          | 4.73E-01      | -0.049           | 0.204           | 4.05E-01       | -1.00           | 2.99           | 0.19          |
| T1D-CD    | 0.096           | 0.053          | 3.45E-02      | 0.142            | 0.064           | 1.33E-02       | 0.22            | 0.34           | 0.26          |
| T1D-JIA   | 0.064           | 0.055          | 1.26E-01      | 0.112            | 0.070           | 5.59E-02       | -0.01           | 0.20           | 0.48          |
| UC-CD     | 0.659           | 0.069          | 0.00E+00      | 0.674            | 0.072           | 0.00E+00       | 0.29            | 0.33           | 0.19          |
| UC-JIA    | 0.046           | 0.067          | 2.49E-01      | 0.024            | 0.073           | 3.72E-01       | 0.30            | 0.21           | 0.08          |
| UC-T1D    | -0.090          | 0.070          | 9.79E-02      | -0.095           | 0.086           | 1.33E-01       | -0.14           | 0.32           | 0.33          |

Supplementary Table 11 Full AUC results from pAID liability prediction analysis

| Trait | Training<br><i>P</i> <sub>threshold</sub> | training |        |        | VALIDATION |        |        |       |
|-------|-------------------------------------------|----------|--------|--------|------------|--------|--------|-------|
|       |                                           | min      | avg    | max    | MIN        | AVG    | MAX    | STDEV |
| JIA   | 1.00E-08                                  | 91.18%   | 91.50% | 92.05% | 86.86%     | 89.27% | 92.46% | 2.06% |
| JIA   | 1.00E-07                                  | 91.78%   | 92.35% | 92.72% | 85.80%     | 88.65% | 91.86% | 2.21% |
| JIA   | 1.00E-06                                  | 92.80%   | 93.16% | 93.53% | 84.15%     | 88.09% | 91.67% | 2.58% |
| JIA   | 1.00E-05                                  | 93.61%   | 93.88% | 94.33% | 82.76%     | 87.06% | 91.14% | 2.56% |
| JIA   | 1.00E-04                                  | 93.85%   | 94.29% | 94.78% | 82.16%     | 86.13% | 89.72% | 2.62% |
| JIA   | 1.00E-03                                  | 94.61%   | 95.07% | 95.41% | 80.03%     | 84.80% | 87.24% | 2.60% |
| CD    | 1.00E-08                                  | 69.65%   | 70.18% | 71.34% | 64.69%     | 68.13% | 70.69% | 1.46% |
| CD    | 1.00E-07                                  | 71.20%   | 72.07% | 73.10% | 66.77%     | 69.42% | 72.37% | 1.59% |
| CD    | 1.00E-06                                  | 74.94%   | 75.42% | 76.29% | 67.90%     | 70.18% | 73.69% | 2.01% |
| CD    | 1.00E-05                                  | 79.35%   | 80.02% | 81.09% | 69.27%     | 71.84% | 75.81% | 1.95% |
| CD    | 1.00E-04                                  | 84.36%   | 85.15% | 85.87% | 70.28%     | 73.79% | 76.69% | 2.16% |
| CD    | 1.00E-03                                  | 90.04%   | 90.61% | 91.17% | 68.20%     | 70.96% | 75.23% | 2.28% |
| UC    | 1.00E-08                                  | 61.55%   | 63.25% | 64.78% | 56.96%     | 60.88% | 64.77% | 2.44% |
| UC    | 1.00E-07                                  | 64.72%   | 66.23% | 67.53% | 58.71%     | 62.51% | 67.24% | 2.47% |
| UC    | 1.00E-06                                  | 70.24%   | 71.46% | 72.66% | 59.27%     | 63.10% | 67.73% | 2.54% |
| UC    | 1.00E-05                                  | 77.77%   | 79.42% | 80.19% | 60.29%     | 64.99% | 68.58% | 2.89% |
| UC    | 1.00E-04                                  | 86.38%   | 87.01% | 87.64% | 62.96%     | 66.01% | 69.39% | 2.07% |
| UC    | 1.00E-03                                  | 92.93%   | 93.59% | 94.23% | 59.81%     | 64.45% | 68.26% | 2.87% |
| T1D   | 1.00E-08                                  | 86.95%   | 87.28% | 87.58% | 84.79%     | 87.29% | 91.32% | 2.12% |
| T1D   | 1.00E-07                                  | 87.27%   | 87.59% | 87.90% | 84.93%     | 87.48% | 91.31% | 1.98% |
| T1D   | 1.00E-06                                  | 88.17%   | 88.34% | 88.60% | 85.43%     | 87.54% | 90.96% | 1.82% |
| T1D   | 1.00E-05                                  | 89.39%   | 89.90% | 90.57% | 85.82%     | 87.37% | 91.16% | 1.81% |
| T1D   | 1.00E-04                                  | 93.14%   | 93.65% | 94.49% | 84.15%     | 85.74% | 88.84% | 1.55% |
| T1D   | 1.00E-03                                  | 97.90%   | 98.01% | 98.14% | 79.65%     | 82.02% | 85.61% | 1.63% |
| CEL   | 1.00E-08                                  | 69.07%   | 70.83% | 72.37% | 56.95%     | 71.25% | 84.73% | 7.57% |
| CEL   | 1.00E-07                                  | 68.89%   | 71.02% | 72.28% | 55.74%     | 70.62% | 83.88% | 7.70% |
| CEL   | 1.00E-06                                  | 70.31%   | 71.81% | 74.98% | 53.79%     | 69.74% | 84.75% | 8.39% |
| CEL   | 1.00E-05                                  | 73.73%   | 75.61% | 77.76% | 51.54%     | 67.50% | 80.26% | 8.06% |
| CEL   | 1.00E-04                                  | 89.07%   | 90.65% | 92.89% | 49.69%     | 63.37% | 74.15% | 7.75% |
| CEL   | 1.00E-03                                  | 99.28%   | 99.50% | 99.75% | 41.18%     | 56.87% | 68.21% | 8.07% |
| PS    | 1.00E-08                                  | 54.09%   | 54.09% | 54.09% | 42.67%     | 42.67% | 42.67% | 0.00% |
| PS    | 1.00E-07                                  | 54.09%   | 57.32% | 60.54% | 39.25%     | 40.96% | 42.67% | 2.42% |
| PS    | 1.00E-06                                  | 54.56%   | 60.02% | 67.04% | 33.00%     | 41.71% | 54.52% | 7.29% |
| PS    | 1.00E-05                                  | 69.84%   | 78.70% | 83.34% | 27.03%     | 38.49% | 60.79% | 9.19% |
| PS    | 1.00E-04                                  | 94.43%   | 96.28% | 97.30% | 31.41%     | 46.69% | 60.78% | 8.19% |
| PS    | 1.00E-03                                  | 99.97%   | 99.98% | 99.99% | 45.38%     | 51.31% | 57.79% | 3.39% |
| SLE   | 1.00E-08                                  | 60.11%   | 61.39% | 63.13% | 46.10%     | 46.98% | 48.12% | 0.84% |
| SLE   | 1.00E-07                                  | 59.21%   | 62.31% | 64.03% | 47.85%     | 52.39% | 58.92% | 3.68% |
| SLE   | 1.00E-06                                  | 62.23%   | 64.80% | 67.67% | 50.69%     | 57.02% | 69.71% | 5.42% |
| SLE   | 1.00E-05                                  | 67.89%   | 71.98% | 78.69% | 45.44%     | 57.40% | 68.04% | 6.31% |
| SLE   | 1.00E-04                                  | 87.24%   | 89.77% | 91.69% | 51.67%     | 56.40% | 61.95% | 3.46% |

|      |          |        |        |         |        |        |        |        |
|------|----------|--------|--------|---------|--------|--------|--------|--------|
| SLE  | 1.00E-03 | 98.99% | 99.19% | 99.66%  | 51.49% | 59.05% | 70.54% | 7.27%  |
| AS   | 1.00E-07 | 49.88% | 55.32% | 63.57%  | 47.22% | 54.53% | 60.33% | 4.44%  |
| AS   | 1.00E-06 | 57.16% | 64.71% | 68.91%  | 47.99% | 57.76% | 67.43% | 6.05%  |
| AS   | 1.00E-05 | 75.69% | 78.57% | 80.91%  | 51.72% | 59.99% | 68.12% | 4.86%  |
| AS   | 1.00E-04 | 94.32% | 95.59% | 96.75%  | 45.23% | 49.94% | 59.43% | 5.36%  |
| AS   | 1.00E-03 | 99.95% | 99.99% | 100.00% | 44.34% | 53.28% | 61.24% | 5.46%  |
| THY  | 1.00E-08 | 62.62% | 62.62% | 62.62%  | 48.14% | 48.14% | 48.14% | 0.00%  |
| THY  | 1.00E-07 | 57.66% | 62.00% | 67.77%  | 44.66% | 48.91% | 56.98% | 4.77%  |
| THY  | 1.00E-06 | 59.48% | 69.51% | 75.99%  | 42.32% | 52.23% | 61.36% | 6.36%  |
| THY  | 1.00E-05 | 77.23% | 82.02% | 89.03%  | 30.03% | 50.14% | 67.09% | 11.91% |
| THY  | 1.00E-04 | 96.49% | 97.10% | 97.96%  | 35.56% | 53.57% | 67.67% | 12.85% |
| THY  | 1.00E-03 | 99.97% | 99.99% | 100.00% | 53.11% | 60.88% | 73.24% | 6.48%  |
| CVID | 1.00E-08 | 60.23% | 61.57% | 62.64%  | 52.47% | 60.65% | 68.12% | 4.14%  |
| CVID | 1.00E-07 | 61.58% | 62.77% | 63.72%  | 53.01% | 60.43% | 64.14% | 3.79%  |
| CVID | 1.00E-06 | 63.67% | 68.46% | 71.38%  | 56.18% | 61.82% | 68.87% | 4.37%  |
| CVID | 1.00E-05 | 73.73% | 77.66% | 82.24%  | 58.44% | 63.57% | 67.32% | 3.39%  |
| CVID | 1.00E-04 | 88.53% | 91.41% | 92.73%  | 57.78% | 64.18% | 72.69% | 4.57%  |
| CVID | 1.00E-03 | 98.80% | 99.11% | 99.27%  | 50.68% | 59.55% | 64.83% | 5.04%  |

**Supplementary Table 12 ICD9 ‘diagnosis’ search terms used to select subjects for inclusion from EMR datasets**

| pAID | ICD9 Search Terms and Codes                                                                                                                                                                                                    |
|------|--------------------------------------------------------------------------------------------------------------------------------------------------------------------------------------------------------------------------------|
| THY  | %Chronic%Thyroiditis%   %Grave%   %Hashimoto%   242.0%   245.0%   245.2%                                                                                                                                                       |
| SPA  | %Ankyl%Spond%litis%   %Spondyloarthopathy%   720%   720%                                                                                                                                                                       |
| PSOR | %Psoriasis%   696.10%                                                                                                                                                                                                          |
| CEL  | %Celiac%   579.00%                                                                                                                                                                                                             |
| SLE  | %Systemic%Lupus%Erythematosus%   710.0%                                                                                                                                                                                        |
| CVID | %Variable%Immunodef%   279.06%                                                                                                                                                                                                 |
| UC   | %Ulcerative%Colitis%   556%                                                                                                                                                                                                    |
| T1D  | %Type%1%Diabetes%   250._1%   250._3%                                                                                                                                                                                          |
| JIA  | %Enthe%rthritis%   %Idiop%rthritis%   %Juvenile%rthritis%   %Mono%rthritis%   %Oligo%rthritis%   %Poly%rthritis%   %Psor%rthritis%   %Rheum%rthritis%   %System%Arthritis%   714%   716.2%   716.5%   716.6%   716.8%   716.9% |
| CD   | %Crohn%   555%                                                                                                                                                                                                                 |

NOTE: ICD9 codes used for EPIC-SQL case identification by patient diagnosis [% = wildcard (0 or more characters), \_ = wildcard (exactly 1 character)]. \*EMR: Electronic Medical Records

## Supplementary References

1. Gran, J. T., Husby, G. & Hordvik, M. Prevalence of ankylosing spondylitis in males and females in a young middle-aged population of Tromsø, northern Norway. *Ann. Rheum. Dis.* **44**, 359–367 (1985).
2. Saraux, A. *et al.* Prevalence of rheumatoid arthritis and spondyloarthropathy in Brittany, France. *J. Rheumatol.* **26**, 2622–2627 (1999).
3. Reveille, J. D. Epidemiology of spondyloarthritis in North America. *Am. J. Med. Sci.* **341**, 284–286 (2011).
4. Neuhausen, S. L. *et al.* Co-occurrence of celiac disease and other autoimmune diseases in celiacs and their first-degree relatives. *J. Autoimmun.* **31**, 160–165 (2008).
5. Ludvigsson, J. F., Lindelöf, B., Zingone, F. & Ciacci, C. Psoriasis in a nationwide cohort study of patients with celiac disease. *J. Invest. Dermatol.* **131**, 2010–2016 (2011).
6. Gelfand, J. M. *et al.* The prevalence of psoriasis in African Americans: Results from a population-based study. *J. Am. Acad. Dermatol.* **52**, 23–6 (2005).
7. Augustin, M. *et al.* Epidemiology and comorbidity of psoriasis in children. *Br. J. Dermatol.* **162**, 633–636 (2010).
8. Iqbal, T., Zaidi, M. A., Wells, G. A. & Karsh, J. Celiac disease arthropathy and autoimmunity study. *J. Gastroenterol. Hepatol.* **28**, 99–105 (2013).
9. Sategna-Guidetti, C. *et al.* Prevalence of thyroid disorders in untreated adult celiac disease patients and effect of gluten withdrawal: An Italian multicenter study. *Am. J. Gastroenterol.* **96**, 751–757 (2001).
10. Ludvigsson, J. J. F., Ludvigsson, J. J. F., Ekbom, A. & Montgomery, S. M. Celiac disease and risk of subsequent type 1 diabetes: A general population cohort study of children and adolescents. *Diabetes Care* **29**, 2483–2488 (2006).
11. Corporaal, S., Bijl, M. & Kallenberg, C. G. Familial occurrence of autoimmune diseases and autoantibodies in a Caucasian population of patients with systemic lupus erythematosus. *Clin Rheumatol* **21**, 108–113 (2002).
12. Bernatsky, S. *et al.* A population-based assessment of systemic lupus erythematosus incidence and prevalence--results and implications of using administrative data for epidemiological studies. *Rheumatology (Oxford)*. **46**, 1814–1818 (2007).
13. Boyle, J. M. & Buckley, R. H. Population prevalence of diagnosed primary immunodeficiency diseases in the United States. *J. Clin. Immunol.* **27**, 497–502 (2007).
14. Deane, S., Selmi, C., Naguwa, S. M., Teuber, S. S. & Gershwin, M. E. Common variable immunodeficiency: Etiological and treatment issues. *Int. Arch. Allergy Immunol.* **150**, 311–324 (2009).
15. Myrtek, D. & Salzer, U. Common Variable Immunodeficiency Genetic INsights into a Complex and Baffling Disease. *Rheumatol.* (1998).
16. Weng, X., Liu, L., Barcellos, L. F., Allison, J. E. & Herrinton, L. J. Clustering of inflammatory bowel disease with immune mediated diseases among members of a northern California-managed care organization. *Am. J. Gastroenterol.* **102**, 1429–1435 (2007).

17. Loftus, E. V *et al.* Ulcerative colitis in Olmsted County, Minnesota, 1940-1993: incidence, prevalence, and survival. *Gut* **46**, 336–343 (2000).
18. Nielsen, N. M. *et al.* Type 1 diabetes and multiple sclerosis: A Danish population-based cohort study. *Arch. Neurol.* **63**, 1001–1004 (2006).
19. Greco, D., Pisciotta, M., Gambina, F. & Maggio, F. Celiac disease in subjects with type 1 diabetes mellitus: A prevalence study in western Sicily (Italy). *Endocrine* **43**, 108–111 (2013).
20. Prahalad, S. *et al.* Familial aggregation of juvenile idiopathic arthritis. *Arthritis Rheum.* **50**, 4022–4027 (2004).
21. Helmick, C. G. *et al.* Estimates of the prevalence of arthritis and other rheumatic conditions in the United States. Part I. *Arthritis Rheum.* **58**, 15–25 (2008).
22. Von Koskull, S., Truckenbrodt, H., Holle, R. & Hörmann, A. Incidence and prevalence of juvenile arthritis in an urban population of southern Germany: a prospective study. *Ann. Rheum. Dis.* **60**, 940–945 (2001).
23. Turkcapar, N. *et al.* The prevalence of extraintestinal manifestations and HLA association in patients with inflammatory bowel disease. *Rheumatol. Int.* **26**, 663–668 (2006).
24. Halfvarson, J., Bodin, L., Tysk, C., Lindberg, E. & Järnerot, G. Inflammatory bowel disease in a Swedish twin cohort: A long-term follow-up of concordance and clinical characteristics. *Gastroenterology* **124**, 1767–1773 (2003).
25. Orholm, M., Binder, V., Sørensen, T. I., Rasmussen, L. P. & Kyvik, K. O. Concordance of inflammatory bowel disease among Danish twins. Results of a nationwide study. *Scand. J. Gastroenterol.* **35**, 1075–1081 (2000).
26. Mearin, M. L. Celiac disease among children and adolescents. *Curr. Probl. Pediatr. Adolesc. Health Care* **37**, 86–105 (2007).
27. Polanko, I., Biemond, I. & Van Leeuwen, A. in *Genet. coeliac Dis.* (ed. McConnell, R.) 211–234 (MTP Press, 1981).
28. Kamath, K. & Dorney, S. Is discordance for coeliac disease in monozygotic twins permanent? *Pediatr. Res.* **17**, (1983).
29. Kaprio, J. *et al.* Concordance for type 1 (insulin-dependent) and type 2 (non-insulin-dependent) diabetes mellitus in a population-based cohort of twins in Finland. *Diabetologia* **35**, 1060–1067 (1992).
30. Prahalad, S. Genetic analysis of juvenile rheumatoid arthritis: approaches to complex traits. *Curr. Probl. Pediatr. Adolesc. Health Care* **36**, 83–90 (2006).
31. Lønnberg, A. S. *et al.* Heritability of psoriasis in a large twin sample. *Br. J. Dermatol.* **169**, 412–416 (2013).
32. Elder, J. T. *et al.* The genetics of psoriasis. *Arch. Dermatol.* **130**, 216–224 (1994).
33. Block, S. R., Winfield, J. B., Lockshin, M. D., D’Angelo, W. A. & Christian, C. L. Studies of twins with systemic lupus erythematosus. A review of the literature and presentation of 12 additional sets. *Am. J. Med.* **59**, 533–552 (1975).
34. Deapen, D. *et al.* A revised estimate of twin concordance in systemic lupus erythematosus. *Arthritis Rheum.* **35**, 311–318 (1992).

35. Järvinen, P. Occurrence of ankylosing spondylitis in a nationwide series of twins. *Arthritis Rheum.* **38**, 381–383 (1995).
36. Hamersma, J. *et al.* Is disease severity in ankylosing spondylitis genetically determined? *Arthritis Rheum.* **44**, 1396–1400 (2001).
37. Mittag, F. *et al.* Use of support vector machines for disease risk prediction in genome-wide association studies: Concerns and opportunities. *Hum. Mutat.* **33**, 1708–1718 (2012).
38. Hyttinen, V., Kaprio, J., Kinnunen, L., Koskenvuo, M. & Tuomilehto, J. Genetic liability of type 1 diabetes and the onset age among 22,650 young Finnish twin pairs: a nationwide follow-up study. *Diabetes* **52**, 1052–1055 (2003).
39. So, H.-C., Gui, A. H. S., Cherny, S. S. & Sham, P. C. Evaluating the heritability explained by known susceptibility variants: a survey of ten complex diseases. *Genet. Epidemiol.* **35**, 310–7 (2011).
40. Zaitlen, N. *et al.* Using extended genealogy to estimate components of heritability for 23 quantitative and dichotomous traits. *PLoS Genet.* **9**, e1003520 (2013).
41. Lee, S. H. *et al.* Estimation of SNP heritability from dense genotype data. *Am. J. Hum. Genet.* **93**, 1151–5 (2013).
42. Chen, G.-B. *et al.* Estimation and partitioning of (co)heritability of inflammatory bowel disease from GWAS and immunochip data. *Hum. Mol. Genet.* (2014). doi:10.1093/hmg/ddu174
43. Lee, S. H., Yang, J., Goddard, M. E., Visscher, P. M. & Wray, N. R. Estimation of pleiotropy between complex diseases using single-nucleotide polymorphism-derived genomic relationships and restricted maximum likelihood. *Bioinformatics* **28**, 2540–2 (2012).
44. Speed, D., Hemani, G., Johnson, M. R. & Balding, D. J. Improved heritability estimation from genome-wide SNPs. *Am. J. Hum. Genet.* **91**, 1011–21 (2012).
45. Speed, D. & Balding, D. J. MultiBLUP: improved SNP-based prediction for complex traits. *Genome Res.* gr.169375.113– (2014). doi:10.1101/gr.169375.113
46. Jia, X. *et al.* *Imputing Amino Acid Polymorphisms in Human Leukocyte Antigens.* *PLoS One* **8**, (Public Library of Science, 2013).
47. Zhu, K.-J. *et al.* Psoriasis regression analysis of MHC loci identifies shared genetic variants with vitiligo. *PLoS One* **6**, e23089 (2011).
48. Darren, C., Robins, G. & Howdle, P. D. Advances in Celiac Disease. *Curr Opin Gastroenterol* **23**, 142–148 (2007).
49. Sollid, L. M. & Jabri, B. Triggers and drivers of autoimmunity: lessons from coeliac disease. *Nat. Rev. Immunol.* **13**, 294–302 (2013).
50. Guerra, S. G., Vyse, T. J. & Cunninghame Graham, D. S. The genetics of lupus: a functional perspective. *Arthritis Res. Ther.* **14**, 211 (2012).
51. Fernando, M. M. A. *et al.* Defining the role of the MHC in autoimmunity: A review and pooled analysis. *PLoS Genet.* **4**, e1000024 (2008).



52. Burton, P. R. *et al.* Association scan of 14,500 nonsynonymous SNPs in four diseases identifies autoimmunity variants. *Nat. Genet.* **39**, 1329–1337 (2007).
53. Munthe-Kaas, M. C. *et al.* HLA Dr-Dq haplotypes and the TNFA-308 polymorphism: Associations with asthma and allergy. *Allergy Eur. J. Allergy Clin. Immunol.* **62**, 991–998 (2007).
54. Jacobson, E. M., Huber, A., Tomer, Y. & Y, T. The HLA gene complex in thyroid autoimmunity: From epidemiology to etiology. *J. Autoimmun.* **30**, 58–62 (2008).
55. Hunt, K. A. *et al.* Newly identified genetic risk variants for celiac disease related to the immune response. *Nat. Genet.* **40**, 395–402 (2008).
56. Van Heel, D. A. *et al.* A genome-wide association study for celiac disease identifies risk variants in the region harboring IL2 and IL21. *Nat. Genet.* **39**, 827–829 (2007).
57. Barrett, J. C. *et al.* Genome-wide association defines more than 30 distinct susceptibility loci for Crohn’s disease. *Nat. Genet.* **40**, 955–962 (2008).
58. Hafler, D. A. *et al.* Risk alleles for multiple sclerosis identified by a genomewide study. *N. Engl. J. Med.* **357**, 851–862 (2007).
59. Consortium, I. M. S. G. *et al.* Genetic risk and a primary role for cell-mediated immune mechanisms in multiple sclerosis. *Nature* **476**, 214 (2011).
60. S, D. *et al.* A genome-wide association study of psoriasis and psoriatic arthritis identifies new disease loci. *PLoS Genet.* **4**, e1000041 (2008).
61. Bowes, J. & Barton, A. Recent advances in the genetics of RA susceptibility. *Rheumatology* **47**, 399–402 (2008).
62. Raychaudhuri, S. *et al.* Common variants at CD40 and other loci confer risk of rheumatoid arthritis. *Nat. Genet.* **40**, 1216–1223 (2008).
63. Harley, J. B. *et al.* Genome-wide association scan in women with systemic lupus erythematosus identifies susceptibility variants in ITGAM, PXX, KIAA1542 and other loci. *Nat. Genet.* **40**, 204–210 (2008).
64. P, D. *et al.* Genome-wide association study of 14 , 000 cases of seven common diseases and. *Nature* **447**, 661–678 (2007).
65. Fisher, S. A. *et al.* Genetic determinants of ulcerative colitis include the ECM1 locus and five loci implicated in Crohn’s disease. *Nat. Genet.* **40**, 710–712 (2008).
66. Franke, A. *et al.* Sequence variants in IL10, ARPC2 and multiple other loci contribute to ulcerative colitis susceptibility. *Nat. Genet.* **40**, 1319–1323 (2008).
67. M, A. Sarcoidosis is associated with a truncating splice site mutation in BTNL2. *Nat. Genet.* **37**, 357 (2005).
68. Abolhassani, H. *et al.* Autoimmune phenotype in patients with common variable immunodeficiency. *J. Investig. Allergol. Clin. Immunol.* **23**, 323–9 (2013).

69. Boileau, J. *et al.* Autoimmunity in common variable immunodeficiency: Correlation with lymphocyte phenotype in the French DEFI study. *J. Autoimmun.* **36**, 25–32 (2011).
70. Robazzi, T. C. *et al.* Autoimmune endocrine disorders and coeliac disease in children and adolescents with juvenile idiopathic arthritis and rheumatic fever. *Clin. Exp. Rheumatol.* **31**, 0310–0317 (2013).
71. Stagi, S., Giani, T., Simonini, G. & Falcini, F. Thyroid function, autoimmune thyroiditis and coeliac disease in juvenile idiopathic arthritis. *Rheumatology (Oxford)*. **44**, 517–520 (2005).
72. Eaton, W. W., Rose, N. R., Kalaydjian, A., Pedersen, M. G. & Mortensen, P. B. Epidemiology of autoimmune diseases in Denmark. *J. Autoimmun.* **29**, 1–9 (2007).
73. Li, W.-Q., Qureshi, A. A., Schernhammer, E. S. & Han, J. Rotating night-shift work and risk of psoriasis in US women. *J. Invest. Dermatol.* **133**, 565–7 (2013).
74. Cohen, A. D., Dreiher, J. & Birkenfeld, S. Psoriasis associated with ulcerative colitis and Crohn's disease. *J. Eur. Acad. Dermatol. Venereol.* **23**, 561–565 (2009).
75. Birkenfeld, S., Dreiher, J., Weitzman, D. & Cohen, A. D. Coeliac disease associated with psoriasis. *Br. J. Dermatol.* **161**, 1331–1334 (2009).
76. Somers, E. C., Thomas, S. L., Smeeth, L. & Hall, A. J. Are individuals with an autoimmune disease at higher risk of a second autoimmune disorder? *Am. J. Epidemiol.* **169**, 749–755 (2009).
77. Mollazadegan, K. *et al.* A population-based study of the risk of diabetic retinopathy in patients with type 1 diabetes and celiac disease. *Diabetes Care* **36**, 316–321 (2013).
78. Sanchez-Albisua, I. *et al.* Coeliac disease in children with Type 1 diabetes mellitus: the effect of the gluten-free diet. *Diabet. Med.* **22**, 1079–1082 (2005).
79. Li Voon Chong, J. S. W., Leong, K. S., Wallymahmed, M., Sturgess, R. & MacFarlane, I. A. Is coeliac disease more prevalent in young adults with coexisting Type 1 diabetes mellitus and autoimmune thyroid disease compared with those with Type 1 diabetes mellitus alone? *Diabet. Med.* **19**, 334–7 (2002).
80. Boelaert, K. *et al.* Prevalence and Relative Risk of Other Autoimmune Diseases in Subjects with Autoimmune Thyroid Disease. *Am. J. Med.* **123**, (2010).
81. Orchard, T. R., Wordsworth, B. P. & Jewell, D. P. Peripheral arthropathies in inflammatory bowel disease: their articular distribution and natural history. *Gut* **42**, 387–391 (1998).
82. Palm, O., Moum, B., Ongre, A. & Gran, J. T. Prevalence of ankylosing spondylitis and other spondyloarthropathies among patients with inflammatory bowel disease: a population study (the IBSEN study). *J. Rheumatol.* **29**, 511–515 (2002).
83. Gupta, G., Gelfand, J. M. & Lewis, J. D. Increased risk for demyelinating diseases in patients with inflammatory bowel disease. *Gastroenterology* **129**, 819–826 (2005).
